# Supplementary material for: Genome-Wide Inference of Ancestral Recombination Graphs
Source: PubMed Central journal article supplement (PMC4022496; doi:10.1371/journal.pgen.1004342), 2014-05-15

inferred minus true recombinations

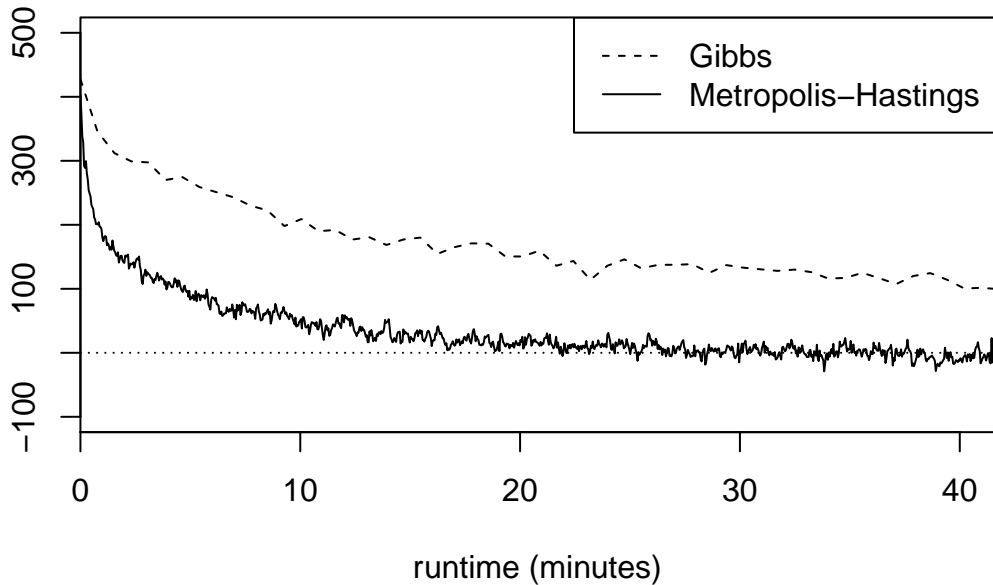

Supplement: pgen.1004342.s003.pdf [file pgen.1004342.s003.pdf]
